# Supplementary material for: Dispersal and gene flow in free-living marine nematodes
Source: Springer Nature journal article supplement (doi:10.1186/1742-9994-10-1), 2013-01-01

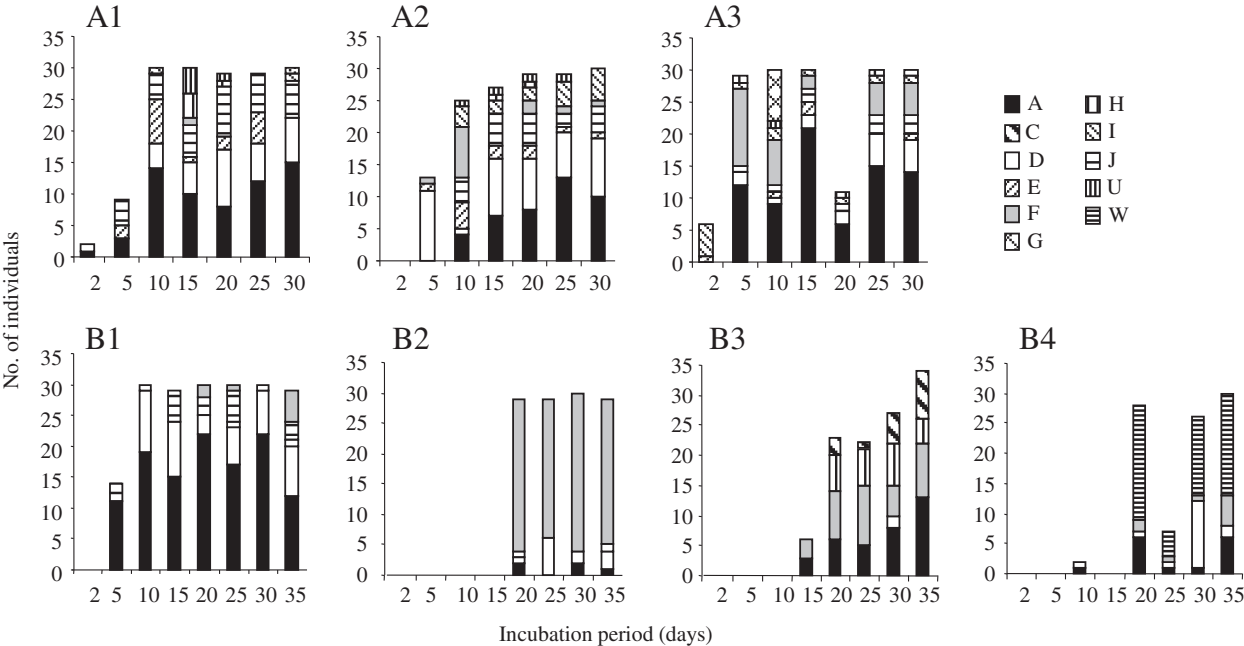

Supplement: 12983_2012_216_MOESM1_ESM.pdf [file 12983_2012_216_MOESM1_ESM.pdf]
