# Supplementary material for: Dispersal and gene flow in free-living marine nematodes
Source: Springer Nature journal article supplement (doi:10.1186/1742-9994-10-1), 2013-01-01

- ← · · → Little differentiation ( $\Phi_{st} < 0.05$ )
- ← → Moderate differentiation ( $0.05 < \Phi_{st} < 0.15$ )
- ← → Large differentiation ( $0.15 < \Phi_{st} < 0.25$ )
- ← → Very large differentiation ( $\Phi_{st} > 0.25$ )

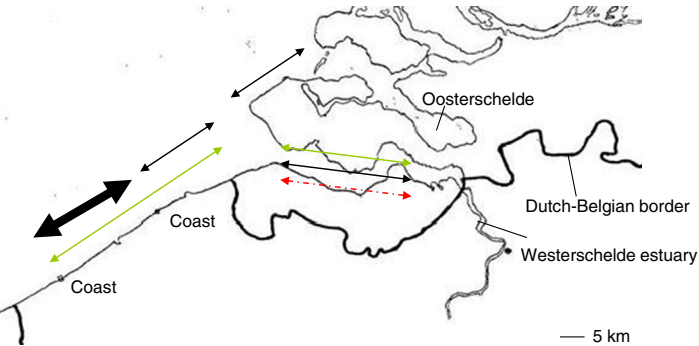

Supplement: 12983_2012_216_MOESM2_ESM.pdf [file 12983_2012_216_MOESM2_ESM.pdf]
