# Supplementary material for: Dispersal and gene flow in free-living marine nematodes
Source: Springer Nature journal article supplement (doi:10.1186/1742-9994-10-1), 2013-01-01

← - - - → No differentiation ( $F_{st} < 0.05$ )

↔ Very large differentiation ( $F_{st} > 0.25$ )

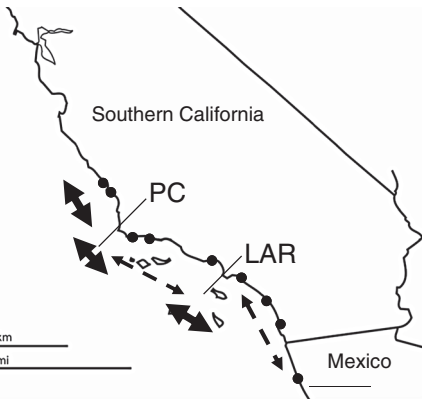

Supplement: 12983_2012_216_MOESM3_ESM.pdf [file 12983_2012_216_MOESM3_ESM.pdf]
